# Supplementary material for: Attenuated Dopamine Receptor Signaling in Nucleus Accumbens Core in a Rat Model of Chemically-Induced Neuropathy
Source: bioRxiv or medRxiv preprint supplement (doi:10.1101/722801), 2019-08-02
Supplement: Supplementary file [file media-1.pdf]

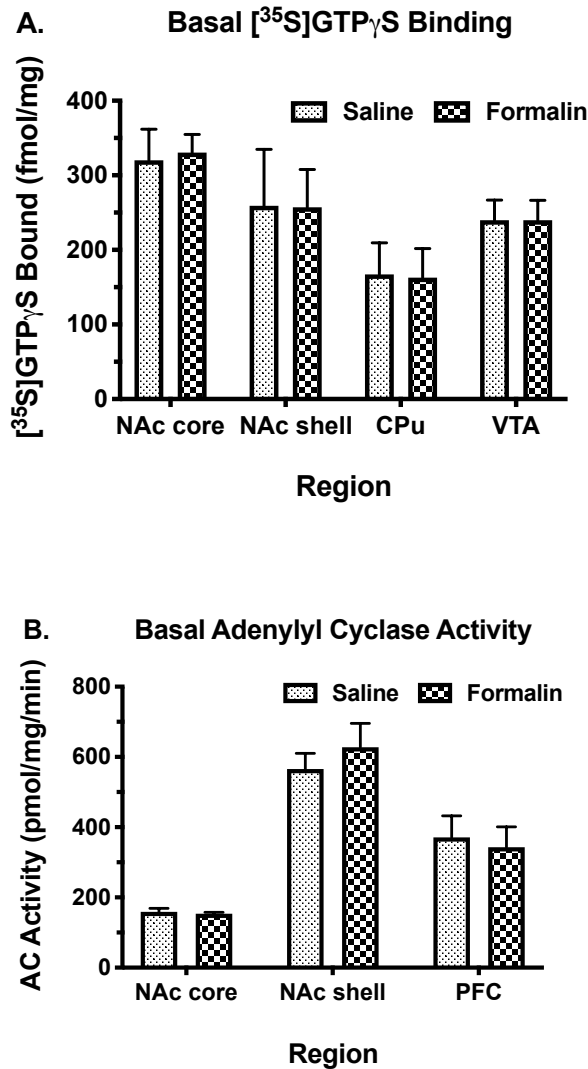

**Supplemental Figure 1.** Basal [<sup>35</sup>S]GTP<sub>γ</sub>S binding and adenylyl cyclase (AC) activity in brain regions of rats treated with intraplantar formalin or saline. Data are mean ± SEM (n = 5-6) of basal [<sup>35</sup>S]GTP<sub>γ</sub>S binding (A) and AC activity (B). Two-way ANOVA of basal [<sup>35</sup>S]GTP<sub>γ</sub>S binding showed a main effect of region [F(3, 40) = 5.007, p = 0.005] but not of formalin treatment [F(1,40) = 0.001, p = 0.975], nor was there an interaction [F(3,40) = 0.011, p = 0.998]. Two-way ANOVA of basal AC activity showed a main effect of region [F(2, 27) = 38.93, p < 0.0001] but not of formalin treatment [F(1,27) = 0.055, p = 0.816], nor was there an interaction [F(2,27) = 0.442, p = 0.648].

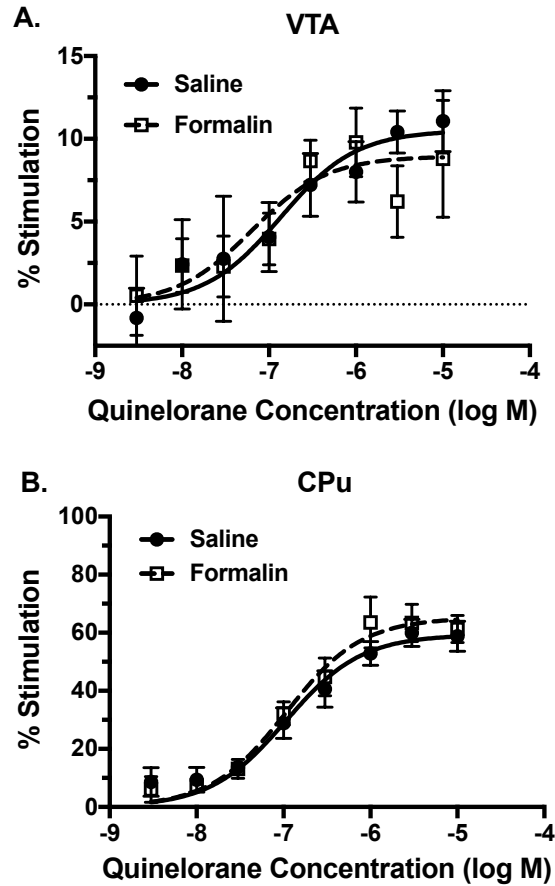

**Supplemental Figure 2.** D<sub>2</sub>-like receptor-stimulated G-protein activity in ventral tegmental area (VTA) and caudate-putamen (CPu) of rats treated with intraplantar formalin or saline. Concentration-effect curves were conducted for stimulation of [<sup>35</sup>S]GTP<sub>γ</sub>S binding by quinolorane in membranes from VTA (A) or CPu (B). Data are mean ± SEM of % stimulation of [<sup>35</sup>S]GTP<sub>γ</sub>S binding (n = 5-6). In VTA, two-way ANOVA showed a significant main effect of quinolorane concentration [F(7,63) = 6.050, p < 0.0001], but there was no effect of formalin treatment [F(1,63) = 0.139, p = 0.710] nor an interaction [F(7,63) = 0.546, p = 0.796]. In CPu, two-way ANOVA showed a significant main effect of quinolorane concentration [F(7,29) = 60.48, p < 0.0001] but no effect of formalin treatment [F(1,29) = 2.01, p = 0.167] nor an interaction [F(7,29) = 0.593, p = 0.756].

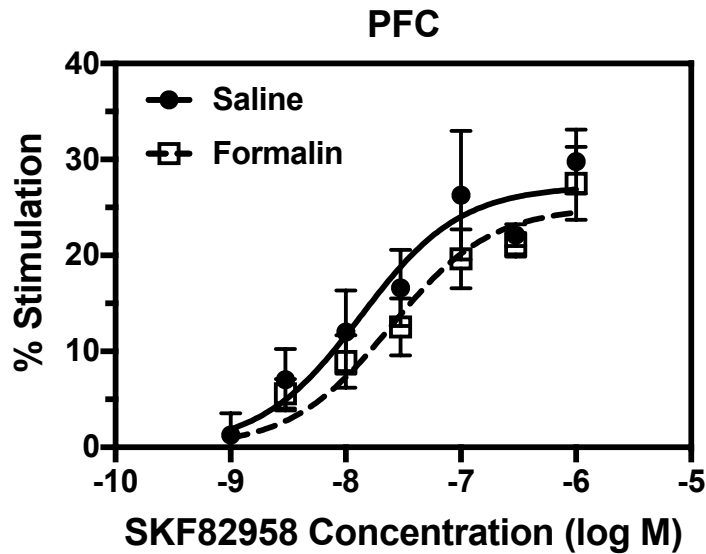

**Supplemental Figure 3.** D<sub>1</sub>-like receptor-stimulated AC activity in PFC of rats treated with intraplantar formalin or saline. Concentration-effect curves were conducted for stimulation of AC activity by SKF82958. Data are mean  $\pm$  SEM of % stimulation of AC activity (n = 4-5). Two-way ANOVA showed a main effect of SKF82958 concentration [F(6,47) = 20.09, p < 0.0001] but not of formalin treatment [F(1,47) = 3.063, p = 0.087] nor an interaction [F(6,60) = 0.176, p = 0.920].

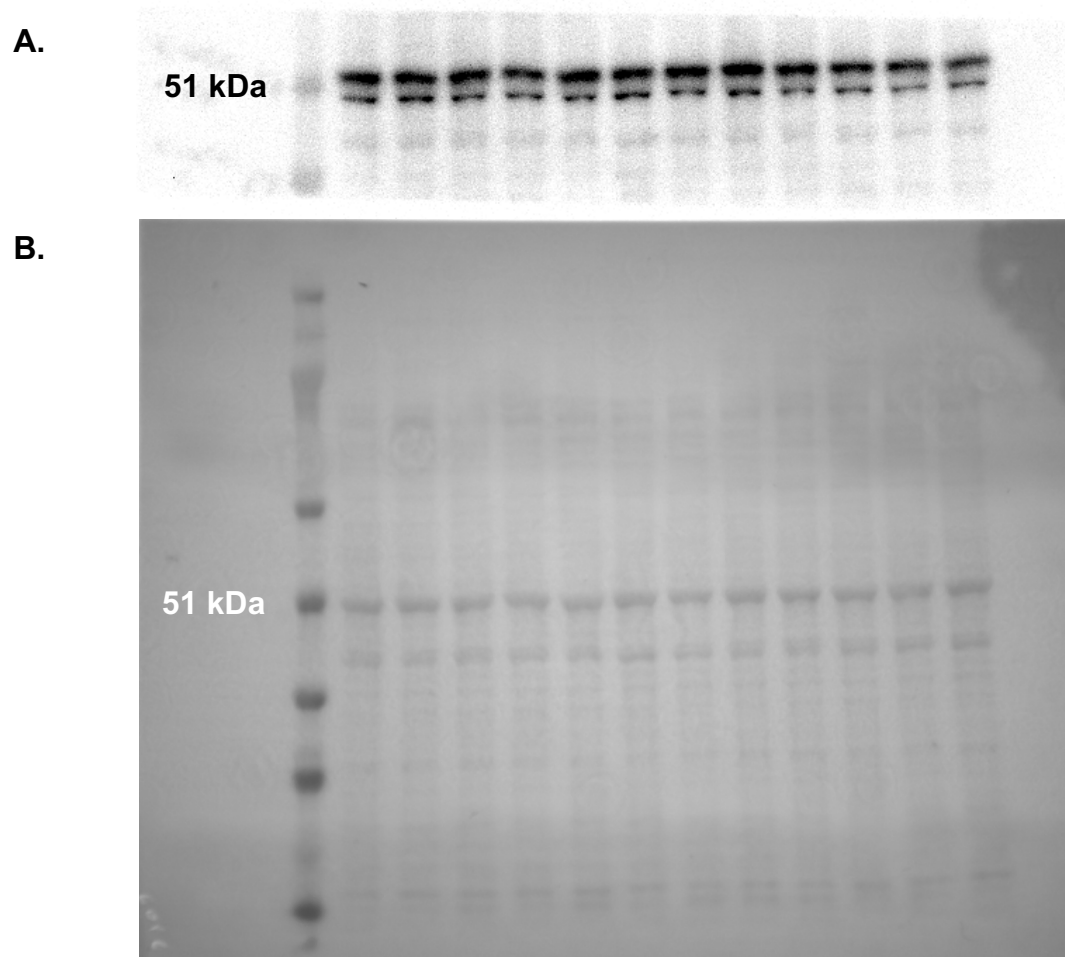

**Supplemental Figure 4.** D<sub>2</sub> receptor immunoreactivity in NAc core of rats treated with intraplantar formalin or saline. Images are D<sub>2</sub> receptor immunoblot (A.) and corresponding Ponceau stain (B). Lanes are: 1, M.W. marker; 2, 4, 6, 8, 10, 12, saline; and 3, 5, 7, 9, 11, 13, formalin. Graphs of densitometry results are shown Figure 3, panels C and E.

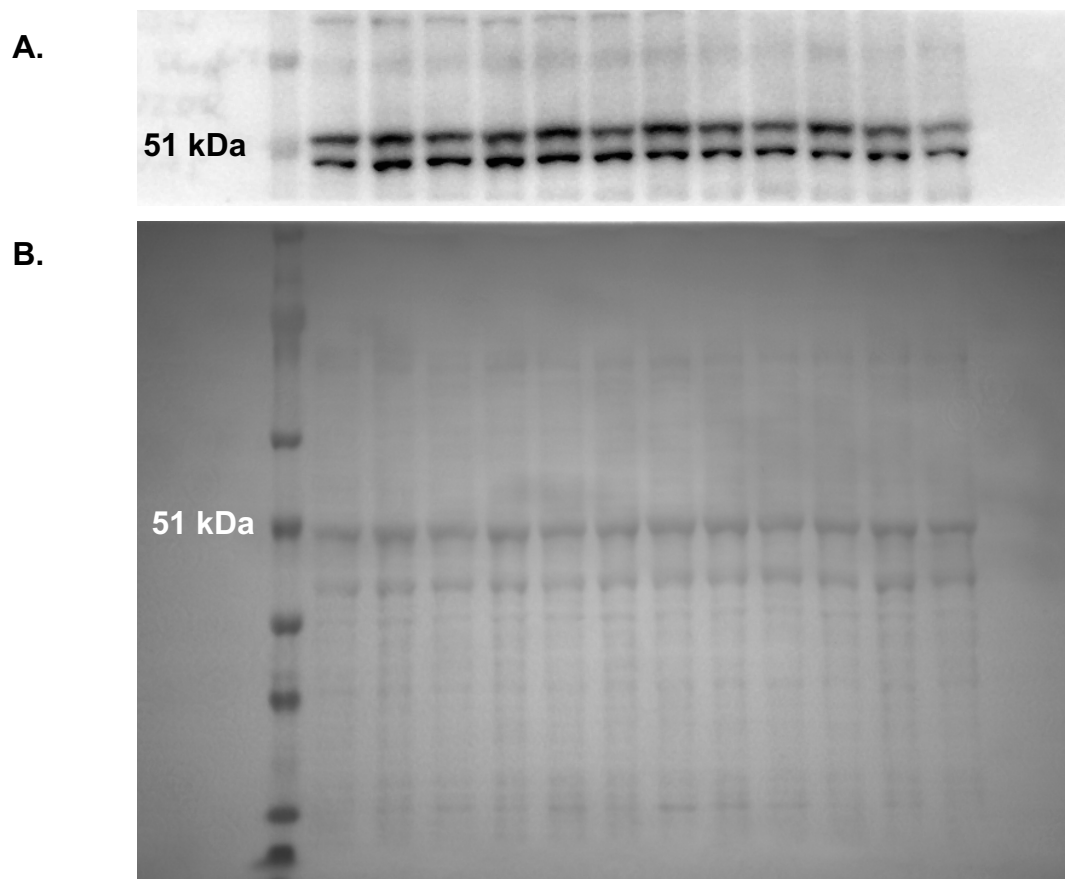

**Supplemental Figure 5.** D<sub>2</sub> receptor immunoreactivity in NAc shell of rats treated with intraplantar formalin or saline. Images are D<sub>2</sub> receptor immunoblot (A.) and corresponding Ponceau stain (B). Lanes are: 1, M.W. marker; 2, 4, 6, 8, 10, 12, saline; and 3, 5, 7, 9, 11, 13, formalin. Graphs of densitometry results are shown Figure 3, panels D and F.

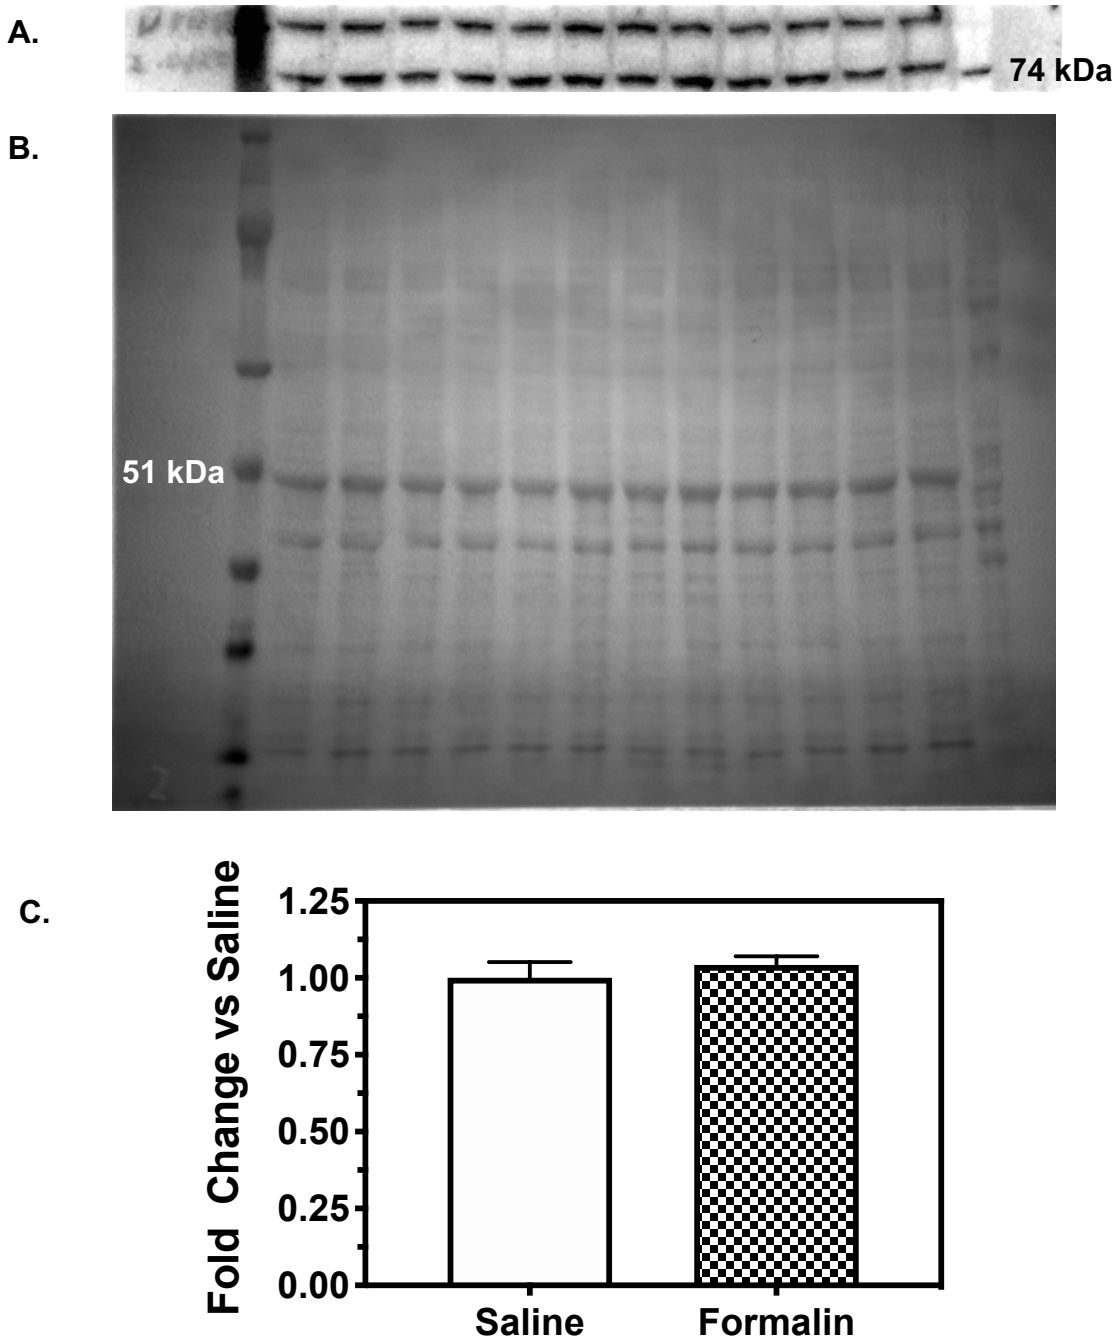

**Supplemental Figure 6.** D<sub>1</sub> receptor immunoreactivity in NAc core of rats treated with intraplantar formalin or saline. Images are D<sub>1</sub> receptor immunoblot (A.), corresponding Ponceau stain (B) and densitometry results (C) (n = 6) (t = 0.719, p = 0.489; n = 6). Lanes are: 1, 14, M.W. marker; 2, 4, 6, 8, 10, 12, saline; and 3, 5, 7, 9, 11, 13, formalin.

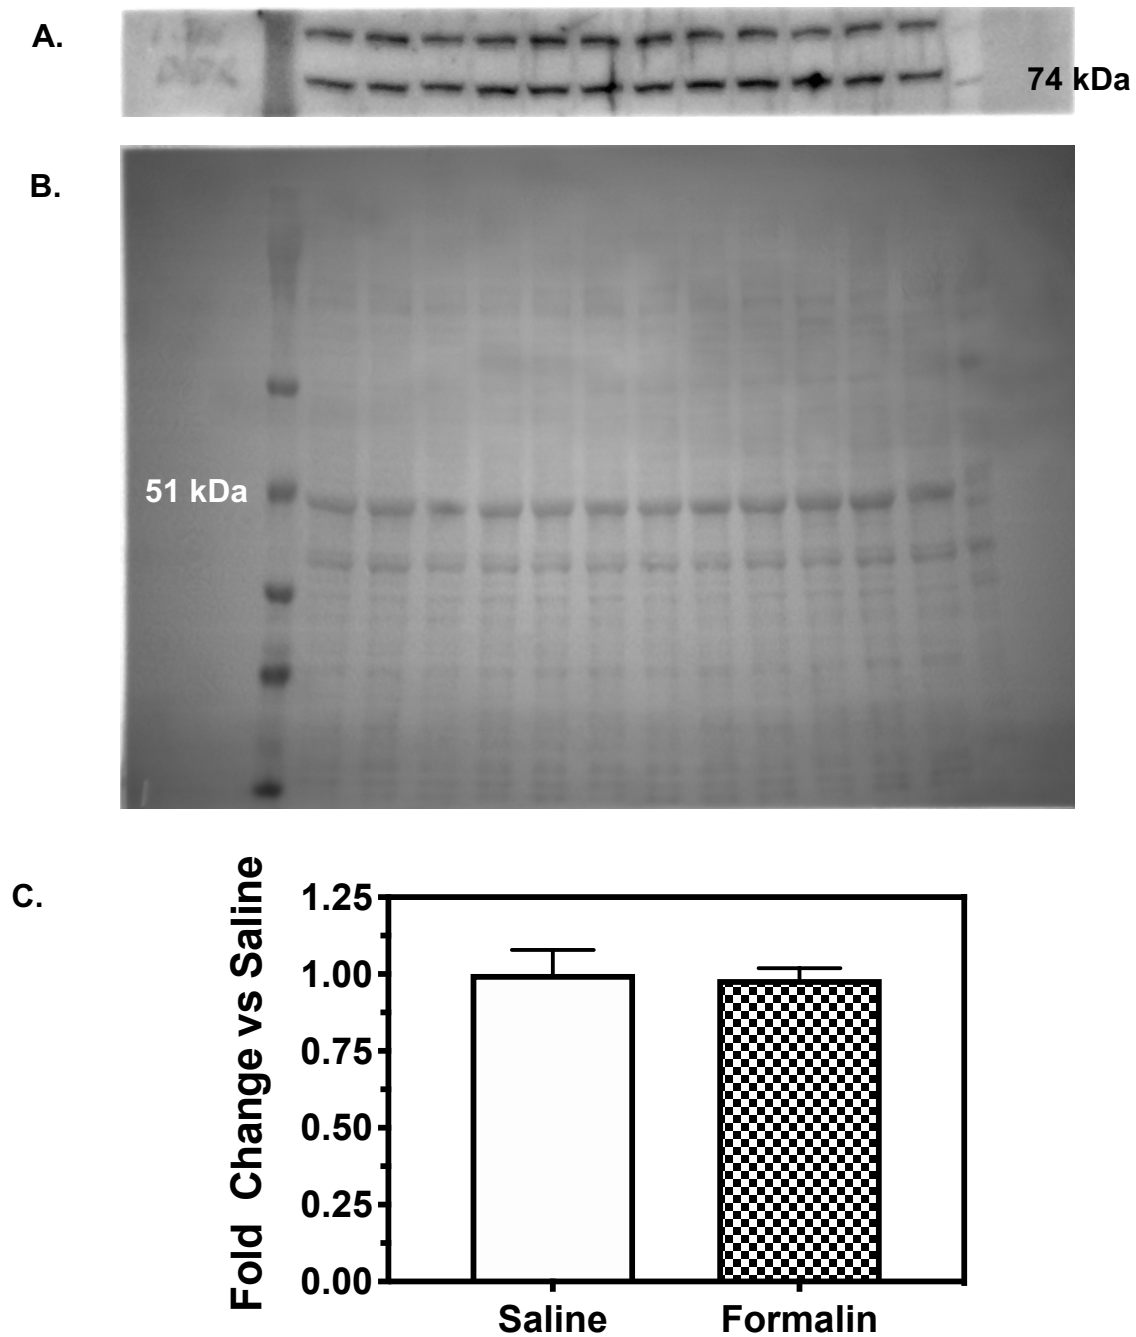

**Supplemental Figure 7.** D<sub>1</sub> receptor immunoreactivity in NAc shell of rats treated with intraplantar formalin or saline. Images are D<sub>1</sub> receptor immunoblot (A.), corresponding Ponceau stain (B) and densitometry results (C) ( $t = 0.0164$ ,  $p = 0.874$ ;  $n = 4-6$ ). Lanes are: 1, 14, M.W. marker; 2, 4, 6, 8, 10, 12, saline; and 3, 5, 7, 9, 11, 13, formalin.
